# Supplementary material for: Stomatal conductance, mesophyll conductance, and transpiration efficiency in relation to leaf anatomy in rice and wheat genotypes under drought
Source: PubMed Central journal article supplement (PMC5853379; doi:10.1093/jxb/erx314), 2017-09-15
Supplement: erx314_suppl_supplementary_table_s1_s4_fig_s1-s7.pdf [file erx314_suppl_supplementary_table_s1_s4_fig_s1-s7.pdf]

## Supplementary tables

Table S1. A two-way analysis of variance of genotype versus water stress for measured and estimated photosynthetic and anatomical parameters.

| Species              |           | $A_n$ | $g_s$ | $g_m$ | TE  | $T_m$ | $S_m$ | $S_c/S_m$ | $S_c$ | $T_w$ | $S_{adaxial}$ | $D_{adaxial}$ | $S_{abaxial}$ | $D_{abaxial}$ | $SAI_{adaxial}$ | $SAI_{abaxial}$ | SAIs | $g_{smax}$ |
|----------------------|-----------|-------|-------|-------|-----|-------|-------|-----------|-------|-------|---------------|---------------|---------------|---------------|-----------------|-----------------|------|------------|
| <i>O. sativa</i>     | Cultivar  | ***   | ***   | ***   | *** | ***   | **    | ***       | ***   | ***   | ***           | ***           | ***           | **            | ***             | ***             | ***  | ***        |
|                      | Treatment | *     | ***   | ***   | **  | ns    | ns    | *         | ns    | ***   | ***           | *             | ***           | ns            | ns              | ***             | ***  | *          |
|                      | CxT       | ns    | ns    | ns    | ns  | ns    | ns    | ns        | ns    | ns    | ns            | ns            | ns            | ns            | *               | ns              | *    | ns         |
| <i>O. glaberrima</i> | Cultivar  |       |       |       |     |       |       |           |       |       |               |               |               |               |                 |                 |      |            |
|                      | Treatment | ns    | *     | ns    | *   | *     | ns    | *         | ns    | ns    | *             | ns            | *             | ns            | ns              | ns              | ns   | ns         |
|                      | CxT       |       |       |       |     |       |       |           |       |       |               |               |               |               |                 |                 |      |            |
| Lowland rice         | Cultivar  | ns    | ns    | ns    | ns  | ***   | ns    | *         | ns    | ***   | ***           | ***           | ***           | **            | ns              | ns              | ns   | ns         |
|                      | Treatment | *     | **    | ***   | *   | ns    | ns    | ns        | ns    | *     | *             | *             | ***           | ns            | ns              | **              | *    | ns         |
|                      | CxT       | ns    | ns    | ns    | ns  | ns    | ns    | ns        | ns    | ns    | ns            | ns            | ns            | ns            | ns              | ns              | *    | ns         |
| Aerobic rice         | Cultivar  | *     | ns    | *     | ns  | **    | ns    | ns        | ns    | ns    | ns            | ***           | ns            | ns            | ***             | ns              | **   | ***        |
|                      | Treatment | ns    | ns    | *     | ns  | *     | ns    | *         | ns    | ns    | *             | ns            | *             | ns            | ns              | ns              | ns   | *          |
|                      | CxT       | ns    | ns    | ns    | ns  | ns    | ns    | ns        | ns    | ns    | ns            | ns            | ns            | *             | **              | ns              | *    | *          |
| Upland rice          | Cultivar  | **    | ns    | **    | **  | ***   | *     | ***       | ***   | ***   | ns            | *             | *             | ns            | ns              | *               | *    | ***        |
|                      | Treatment | ns    | *     | *     | ns  | ns    | ns    | ns        | *     | *     | ns            | ns            | *             | ns            | *               | **              | **   | *          |
|                      | CxT       | ns    | ns    | ns    | ns  | ns    | ns    | ns        | ns    | ns    | ns            | ns            | ns            | ns            | ns              | ns              | ns   | ns         |
| Wheat                | Cultivar  | ns    | ns    | *     | ns  | ***   | ns    | ns        | ns    | ***   | ns            | ***           | ns            | ***           | *               | ***             | ***  | ***        |
|                      | Treatment | ns    | **    | **    | *   | ns    | *     | ns        | *     | *     | *             | ***           | **            | ns            | ns              | **              | ns   | ns         |
|                      | CxT       | ns    | ns    | ns    | ns  | ns    | ns    | ns        | ns    | ns    | ns            | ns            | ns            | ns            | ns              | *               | *    | *          |
| Rice + Wheat         | Cultivar  | ***   | ***   | ***   | *** | ***   | ***   | ***       | ***   | ***   | ***           | ***           | ***           | ***           | ***             | ***             | ***  | ***        |
|                      | Treatment | **    | ***   | ***   | *** | *     | *     | ns        | ns    | ***   | ***           | **            | ***           | ns            | ns              | ***             | **   | ns         |
|                      | CxT       | ns    | ns    | ns    | ns  | ns    | ns    | *         | *     | ns    | **            | ns            | ***           | *             | **              | **              | **   | *          |

$A_n$  = light-saturated photosynthesis;  $g_s$  = stomatal conductance;  $g_m$  = mesophyll conductance; TE = leaf transpiration efficiency;  $T_m$  = mesophyll thickness;  $S_m$  = mesophyll surface area exposed to intercellular airspace per leaf area;  $S_c/S_m$  = ratio of the exposed surface area of chloroplast to the exposed surface area of mesophyll cell walls;  $S_c$  = chloroplast surface area exposed to intercellular airspace per leaf area;  $T_w$  = mesophyll cell wall thickness;  $S_{adaxial}$  ( $S_{abaxial}$ ) = stomatal size on the adaxial (abaxial) leaf surface;  $D_{adaxial}$  ( $D_{abaxial}$ ) = stomatal density on the adaxial (abaxial) leaf surface;  $SAI_{adaxial}$  ( $SAI_{abaxial}$ ) = stomatal area index on the adaxial (abaxial) leaf surface; SAIs = summed stomatal area index on both leaf surfaces;  $g_{smax}$  = maximum stomatal conductance. The significance of each correlation: \*, P < 0.05; \*\*, P < 0.01; \*\*\*, P < 0.001; ns, not significant.

Table S2. Multiple regression analysis of light-saturated photosynthesis ( $A_n$ ) as a function of  $g_s$  and  $g_m$  ( $A_n = b_0 + b_1g_s + b_2g_m$ ), based on data of three treatments.

| Genotype             | Intercept | Regression coefficient |          |       | No. of data points |
|----------------------|-----------|------------------------|----------|-------|--------------------|
|                      | $b_0$     | $b_1$                  | $b_2$    | $R^2$ |                    |
| Lowland rice         | 4.79      | 20.91**                | 23.83    | 0.85  | 18                 |
| Aerobic rice         | 6.58      | 16.13                  | 25.30*   | 0.42  | 18                 |
| Upland rice          | 4.67      | 19.26*                 | 59.76*** | 0.79  | 18                 |
| <i>O. glaberrima</i> | 7.40      | -19.69                 | 50.02    | 0.52  | 9                  |
| <i>O. sativa</i>     | 5.55      | 9.10**                 | 52.80*** | 0.59  | 54                 |
| Wheat                | 5.31      | 13.41                  | 65.13*** | 0.79  | 18                 |
| Rice + Wheat         | 3.43      | 9.58**                 | 77.76*** | 0.90  | 81                 |

\*, \*\*, \*\*\* significant at the 0.05, 0.01 and 0.001 probability levels, respectively.

Table S3. Multiple regression analysis of TE as a function of  $g_s$  and  $g_m$  ( $TE = b_0 + b_1g_s + b_2g_m$ ), based on data of three treatments.

| Genotype             | Intercept | Regression coefficient |          |       | No. of data points |
|----------------------|-----------|------------------------|----------|-------|--------------------|
|                      | $b_0$     | $b_1$                  | $b_2$    | $R^2$ |                    |
| Lowland rice         | 3.41      | -4.19*                 | -0.48    | 0.69  | 18                 |
| Aerobic rice         | 5.46      | -18.45*                | 8.03     | 0.34  | 18                 |
| Upland rice          | 4.78      | -16.95***              | 19.01*** | 0.74  | 18                 |
| <i>O. glaberrima</i> | 5.47      | -27.06**               | 13.60    | 0.82  | 9                  |
| <i>O. sativa</i>     | 4.13      | -12.11***              | 15.33*** | 0.72  | 54                 |
| Wheat                | 5.46      | -10.38***              | 5.12     | 0.63  | 18                 |
| Rice + Wheat         | 4.07      | -12.21***              | 15.33*** | 0.69  | 81                 |

\*, \*\*, \*\*\* significant at the 0.05, 0.01 and 0.001 probability levels, respectively.

Table S4. Multiple regression analysis of mesophyll conductance ( $g_m$ ) as a function of  $T_w$ ,  $S_c/S_m$  and  $N_a$  ( $g_m = b_0 + b_1T_w + b_2S_c/S_m + b_3N_a$ ), based on combined data of all three water treatments.

| Genotype             | Intercept | Regression coefficient |         |         | $R^2$ | No. of data points |
|----------------------|-----------|------------------------|---------|---------|-------|--------------------|
|                      | $b_0$     | $b_1$                  | $b_2$   | $b_3$   |       |                    |
| Lowland rice         | -0.11     | -0.03                  | 0.33*   | -0.04   | 0.43  | 18                 |
| Aerobic rice         | -0.15     | -0.18                  | 0.42**  | -0.02   | 0.60  | 18                 |
| Upland rice          | -0.15     | 0.13                   | 0.15    | 0.11    | 0.44  | 18                 |
| <i>O. glaberrima</i> | -0.06     | 0.37                   | 0.24*   | -0.17** | 0.86  | 9                  |
| <i>O. sativa</i>     | 0.08      | -0.67**                | 0.24*** | -0.06** | 0.40  | 54                 |
| Wheat                | 0.36      | -4.04***               | 0.29    | 0.04    | 0.74  | 18                 |
| Rice + Wheat         | 0.04      | -1.15***               | 0.36*** | -0.05** | 0.78  | 81                 |

## Supplementary figures

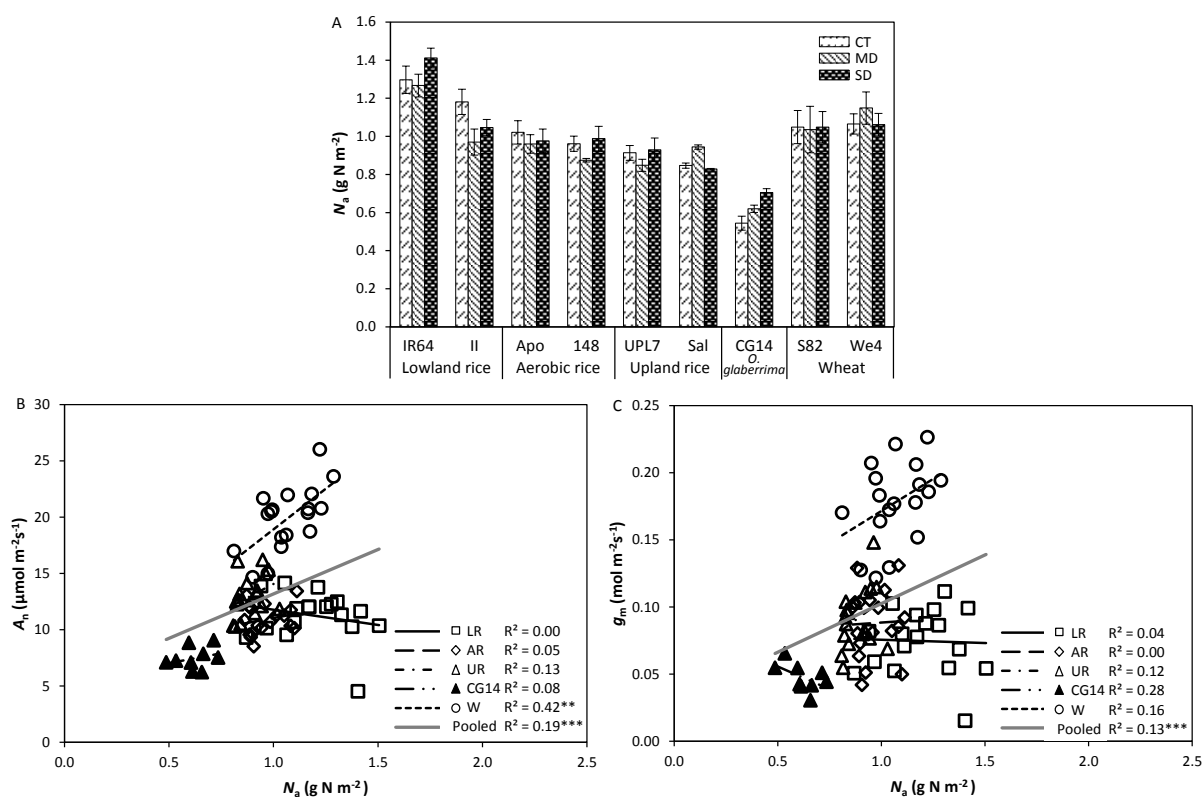

Fig. S1. (A) Response of leaf nitrogen per unit area ( $N_a$ ) of rice and wheat cultivars to water stress treatments: control (CT); mild drought (MD); more severe drought (SD). (B) Relationship between photosynthetic rate ( $A_n$ ) ( $400 \mu\text{mol mol}^{-1} \text{CO}_2$ ,  $1000\text{-}1500 \mu\text{mol m}^{-2} \text{s}^{-1}$  irradiance, and  $25^\circ\text{C}$ ) and  $N_a$ ; (C) Relationship between mesophyll conductance ( $g_m$ ) and  $N_a$ . LR: lowland rice; AR: aerobic rice; UR: upland rice; CG14: *O. glaberrima*; W: wheat. Linear regressions were fitted for overall data and for each genotype group. The significance of each correlation is shown as: \*,  $P < 0.05$ ; \*\*,  $P < 0.01$ ; \*\*\*,  $P < 0.001$ .

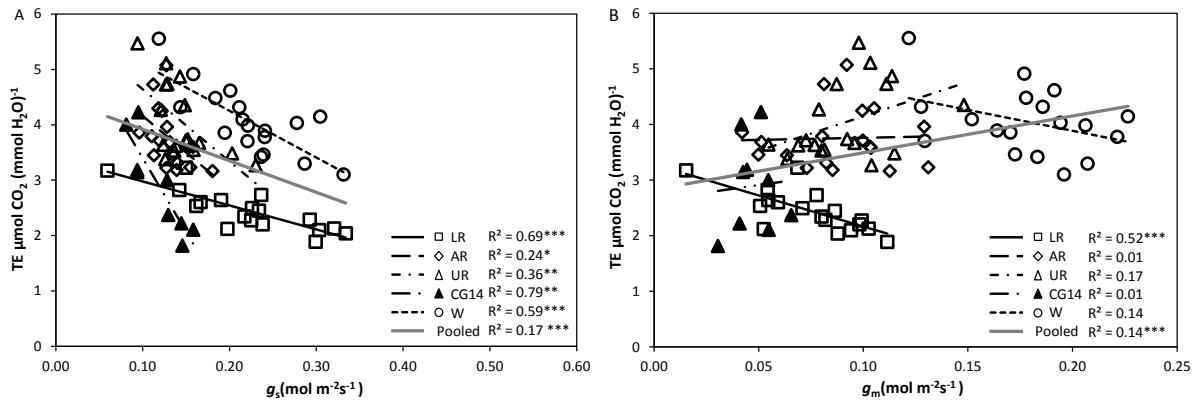

Fig. S2. Relationship between transpiration efficiency (TE) and stomatal conductance ( $g_s$ ), and between TE and mesophyll conductance ( $g_m$ ). Values of TE and  $g_s$  were obtained and calculated under  $400 \mu\text{mol mol}^{-1} \text{CO}_2$ ,  $1000\text{-}1500 \mu\text{mol m}^{-2} \text{s}^{-1}$  irradiance, and  $25^\circ\text{C}$ .  $g_m$  was calculated based on the non-rectangular hyperbolic method (Yin and Struik, 2009). LR: lowland rice; AR: aerobic rice; UR: upland rice; CG14: *O. glaberrima*; W: wheat. Linear regressions were fitted for overall data and for each genotype group. The significance of each correlation is shown as: \*,  $P < 0.05$ ; \*\*,  $P < 0.01$ ; \*\*\*,  $P < 0.001$ .

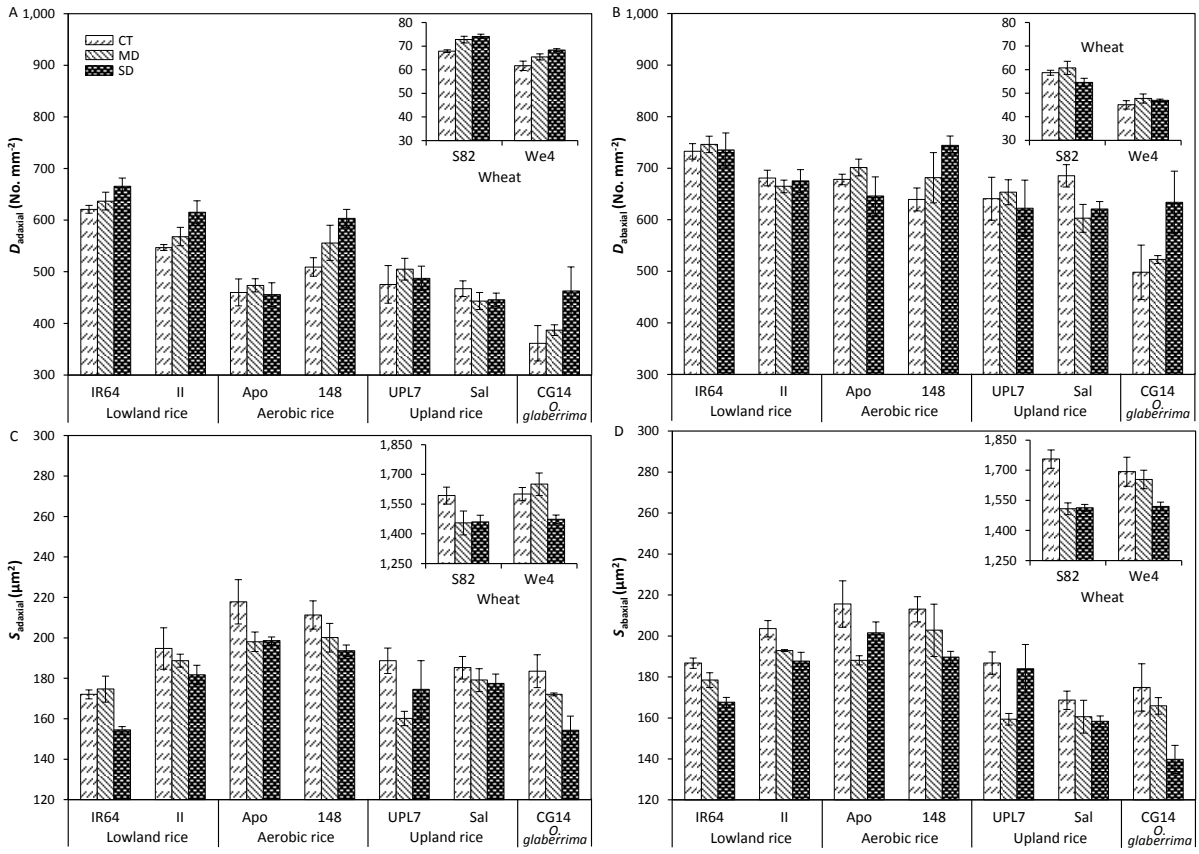

Fig. S3. Stomatal density ( $D$ ) and size ( $S$ ) from adaxial side (A, C) and abaxial side (B, D) of rice and wheat cultivars under three treatments: control (CT); mild drought (MD); and more severe drought (SD).

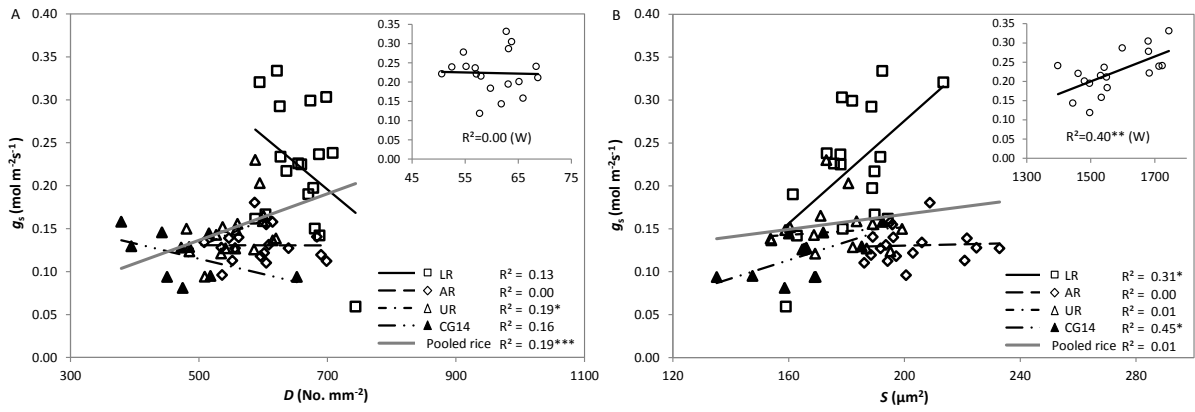

Fig. S4. The relationships between stomatal conductance ( $g_s$ ) and stomatal density ( $D$ ), and between  $g_s$  and stomatal size ( $S$ ). Values of  $g_s$  were obtained and calculated under  $400 \mu\text{mol mol}^{-1} \text{CO}_2$ ,  $1000\text{-}1500 \mu\text{mol m}^{-2} \text{s}^{-1}$  irradiance, and  $25^\circ\text{C}$ .  $S$  and  $D$  have been calculated as the average between both sides of the leaf. LR: lowland rice; AR: aerobic rice; UR: upland rice; CG14: *O. glaberrima*; W: wheat. Linear regressions were fitted for overall data and for each genotype group. The significance of each correlation is shown as: \*,  $P < 0.05$ ; \*\*,  $P < 0.01$ ; \*\*\*,  $P < 0.001$ .



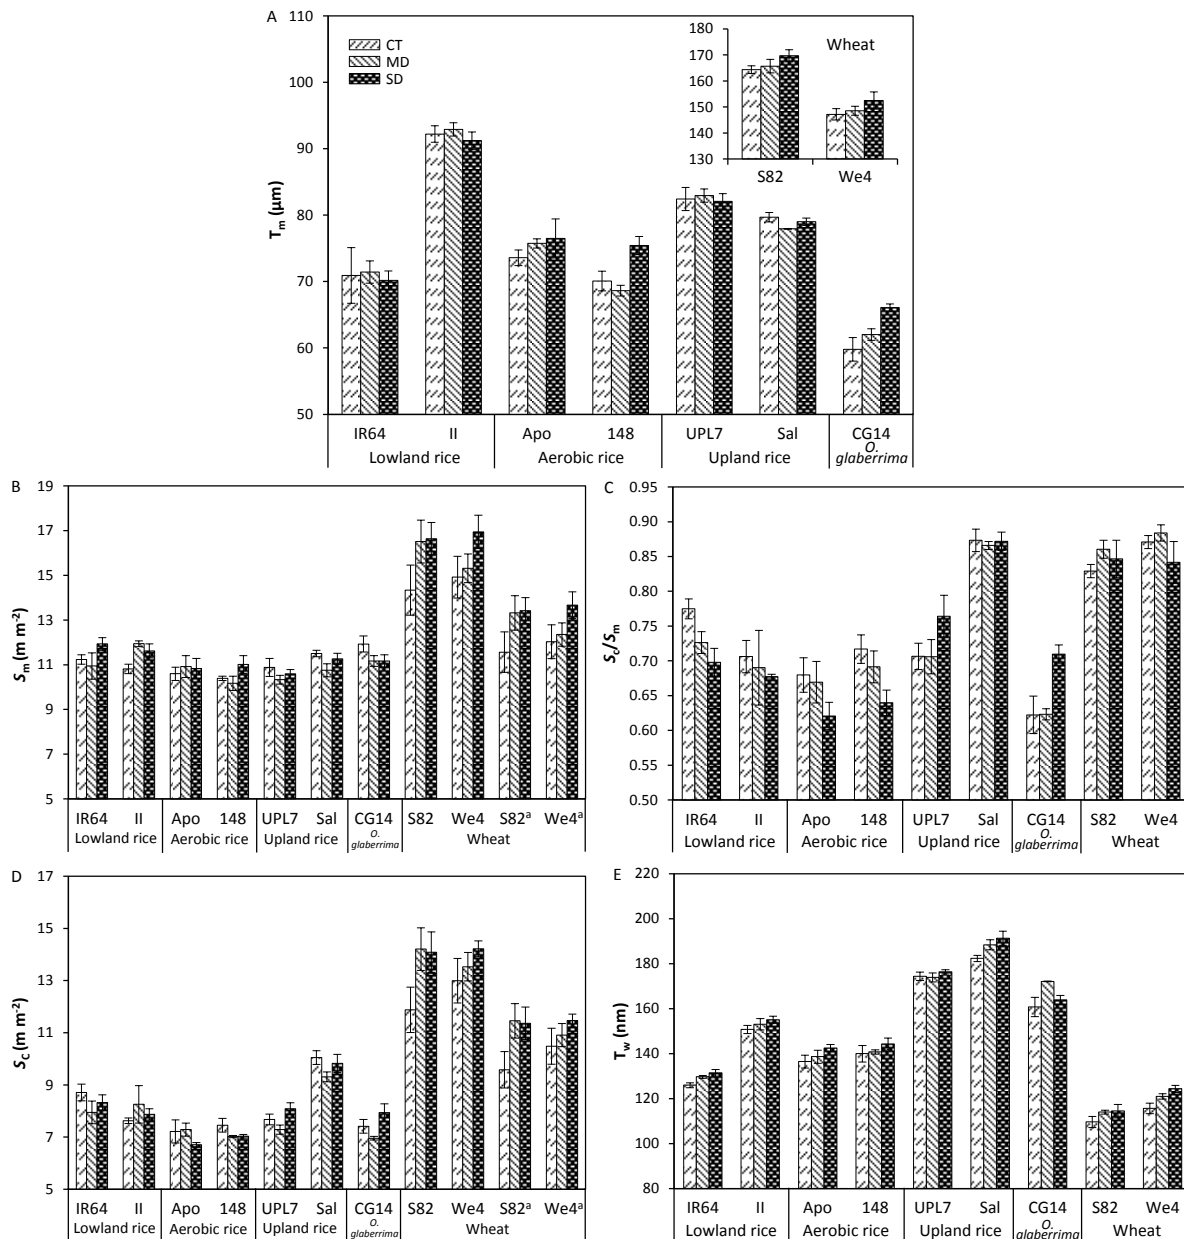

Fig. S5. Mesophyll cell properties of wheat and rice leaves obtained from light and electron microscope images under three treatments: control (CT); mild drought (MD); and more severe drought (SD). (A) mesophyll thickness ( $T_m$ ); (B) the surface area of mesophyll cells exposed to the intercellular airspaces per leaf area ( $S_m$ ); (C) ratio of the exposed surface area of chloroplast to the exposed surface area of mesophyll cell walls ( $S_c/S_m$ ); (D) the surface area of chloroplasts exposed to intercellular airspace per leaf area ( $S_c$ ); and (E) thickness of the mesophyll cell wall ( $T_w$ ). For wheat cultivars marked by superscript <sup>a</sup> in B and D, we used the alternative value 1.25 as the curvature correction factor ( $F$ ) for calculating  $S_m$  and  $S_c$ .

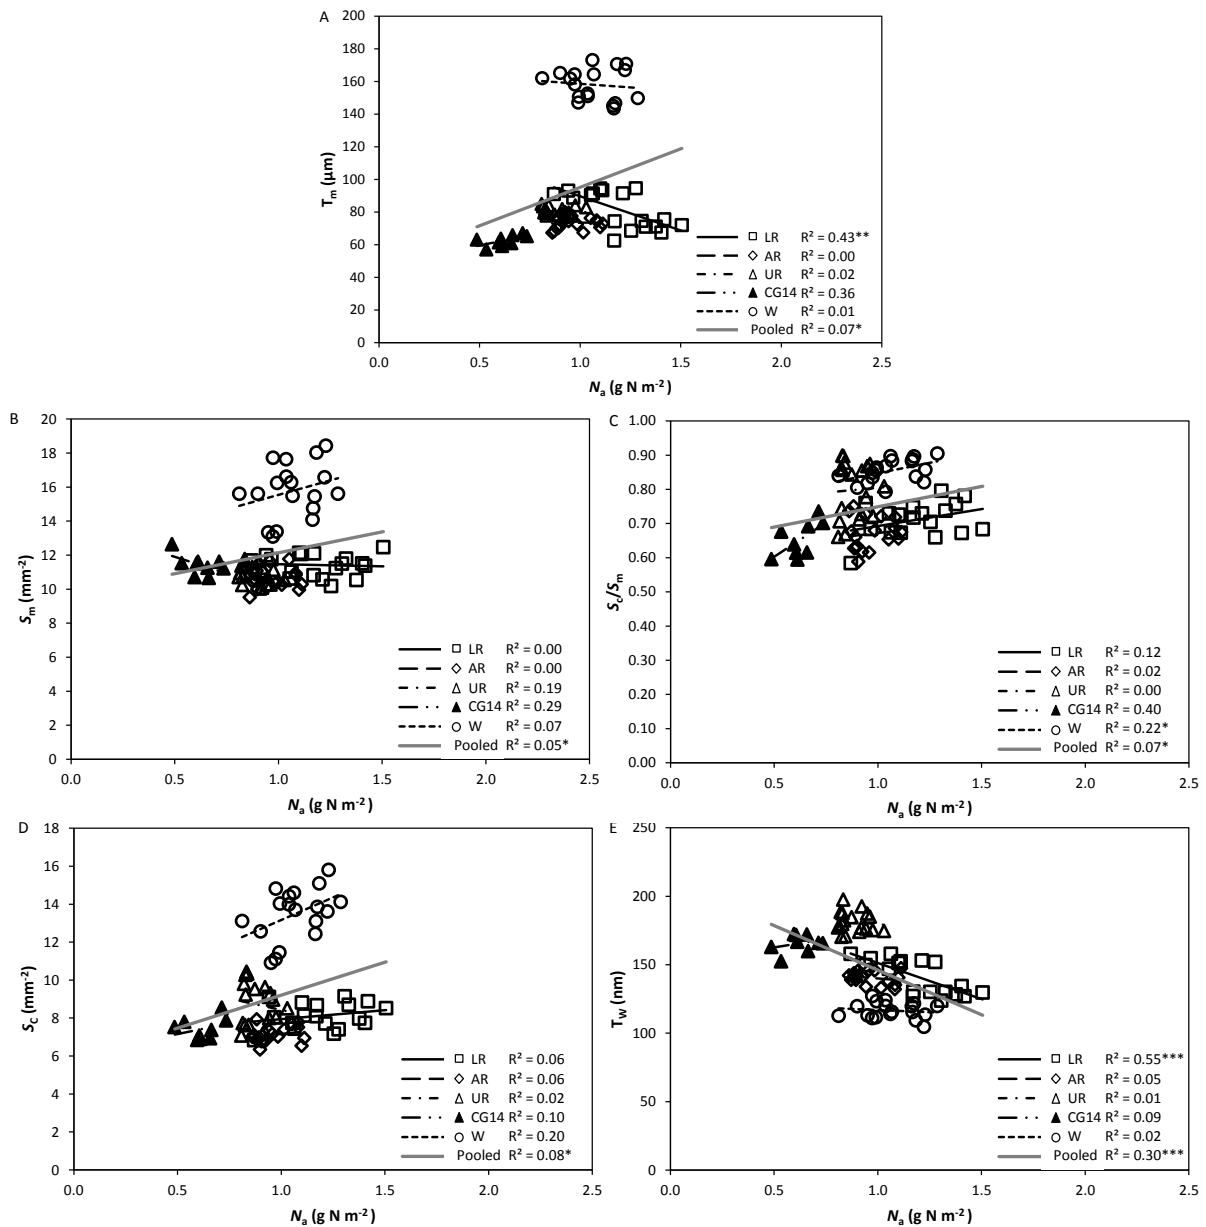

Fig. S6. Relationships between (A) mesophyll thickness ( $T_m$ ) and  $N_a$ ; (B) the surface area of mesophyll cells exposed to the intercellular airspaces per leaf area ( $S_m$ ) and  $N_a$ ; (C) ratio of the exposed surface area of chloroplast to the exposed surface area of mesophyll cell walls ( $S_c/S_m$ ) and  $N_a$ ; (D) the surface area of chloroplasts exposed to intercellular airspace per leaf area ( $S_c$ ) and  $N_a$ ; and (E) thickness of the mesophyll cell wall ( $T_w$ ) and  $N_a$ . LR: lowland rice; AR: aerobic rice; UR: upland rice; CG14: *O. glaberrima*; W: wheat. Linear regressions were fitted for each genotype group. The significance of each correlation is shown as: \*,  $P < 0.05$ ; \*\*,  $P < 0.01$ ; \*\*\*,  $P < 0.001$ .

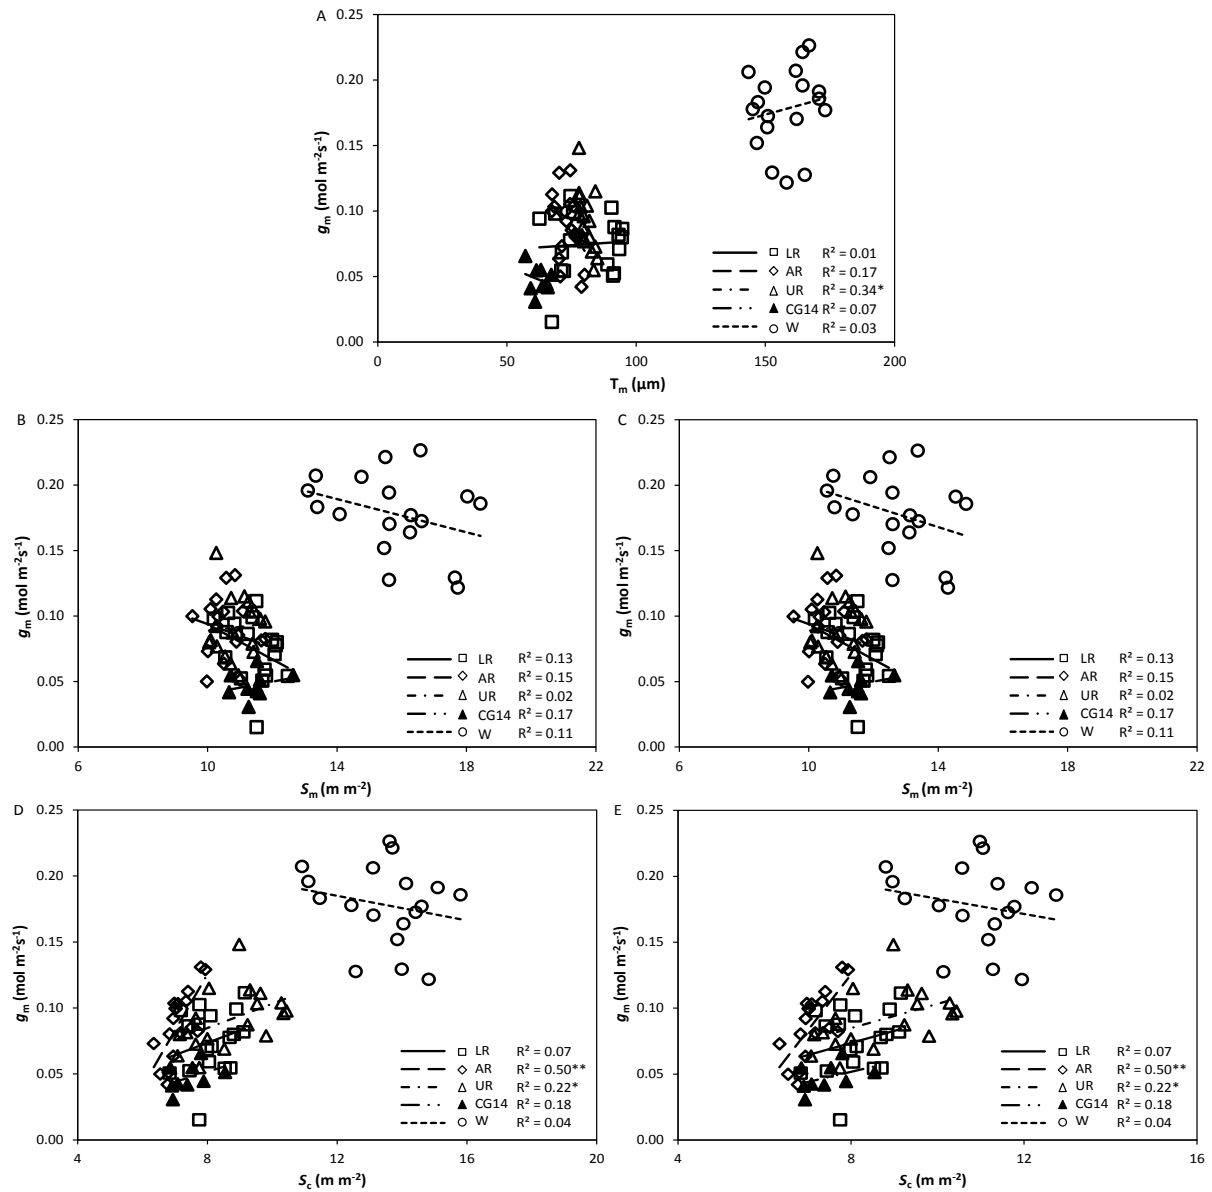

Fig. S7. The relationship between mesophyll conductance ( $g_m$ ) (NRH-A method) and (A) mesophyll thickness ( $T_m$ ); (B,C) the surface area of mesophyll cells exposed to the intercellular airspaces per leaf area ( $S_m$ ); and (D,E) the surface area of chloroplasts exposed to intercellular airspace per leaf area ( $S_c$ ). In B and D we used the value 1.55 as curvature correction factor ( $F$ ) for calculating  $S_m$  and  $S_c$  in both rice and wheat cultivars; in C and E we used the value 1.55 as  $F$  for calculating  $S_m$  and  $S_c$  in rice and 1.25 for wheat cultivars. LR: lowland rice; AR: aerobic rice; UR: upland rice; CG14: *O. glaberrima*; W: wheat. Linear regressions were fitted for each genotype group. The significance of each correlation is shown as: \*,  $P < 0.05$ ; \*\*,  $P < 0.01$ ; \*\*\*,  $P < 0.001$ .
